# Supplementary material for: Multiple neural bHLHs ensure the precision of a neuronal specification event in Caenorhabditis elegans
Source: PubMed Central journal article supplement (PMC8713986; doi:10.1242/bio.058976), 2021-12-23
Supplement: biolopen-10-058976-s1.pdf [file biolopen-10-058976-s1.pdf]

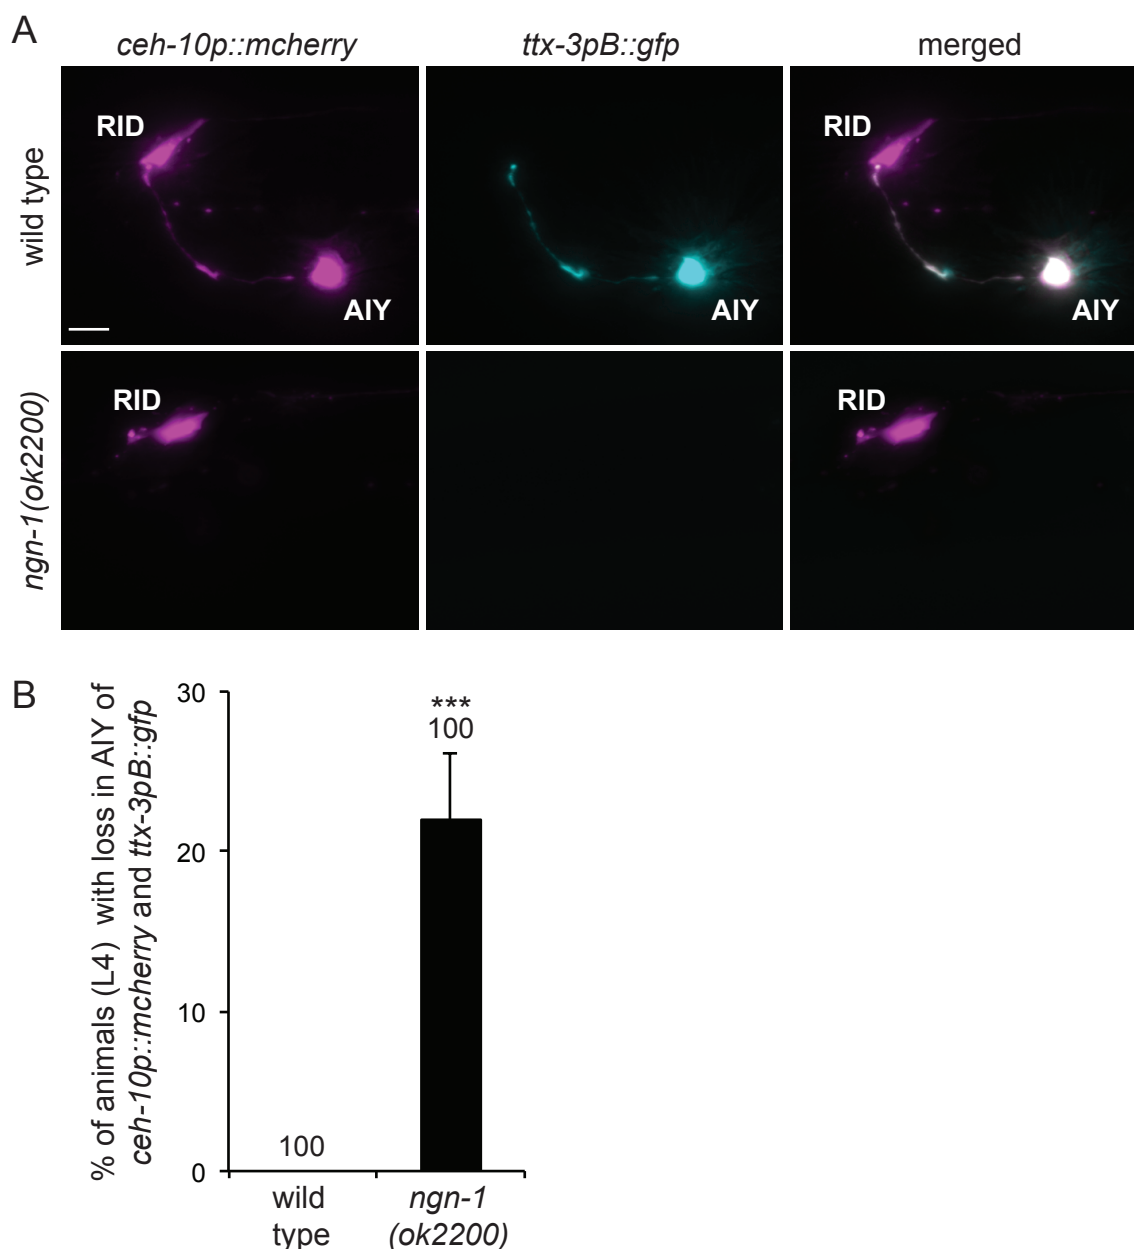

**Fig. S1. Effect of *ngn-1* on *ceh-10* and *ttx-3* co-expression in AIY.**

(A) Co-expression of *ceh-10p::mcherry* (*hpls292*) and *ttx-3pB::gfp* (*mgls18*) in the AIY neuron of wild type or *ngn-1* mutant larvae (L4). *ngn-1* affects *ceh-10p::mcherry* and *ttx-3pB::gfp* expression in the AIY neuron, but not *ceh-10p::mcherry* expression in another neuron, RID. Lateral view, anterior is left, dorsal is up, scale bar = 10  $\mu$ m.

(B) Percentage of animals with a loss of *ceh-10p::mcherry* (*hpls292*) and *ttx-3pB::gfp* (*mgls18*) expression in at least one AIY in wild type or *ngn-1* mutants, in late larvae (L4). In one AIY, when *ceh-10p::mcherry* expression is absent, *ttx-3pB::gfp* expression is also absent, and vice versa. Error bars show standard error of proportion; numbers above the bars show numbers of animals analyzed; \*\*\*  $p < 0.001$ , Fisher's exact test.

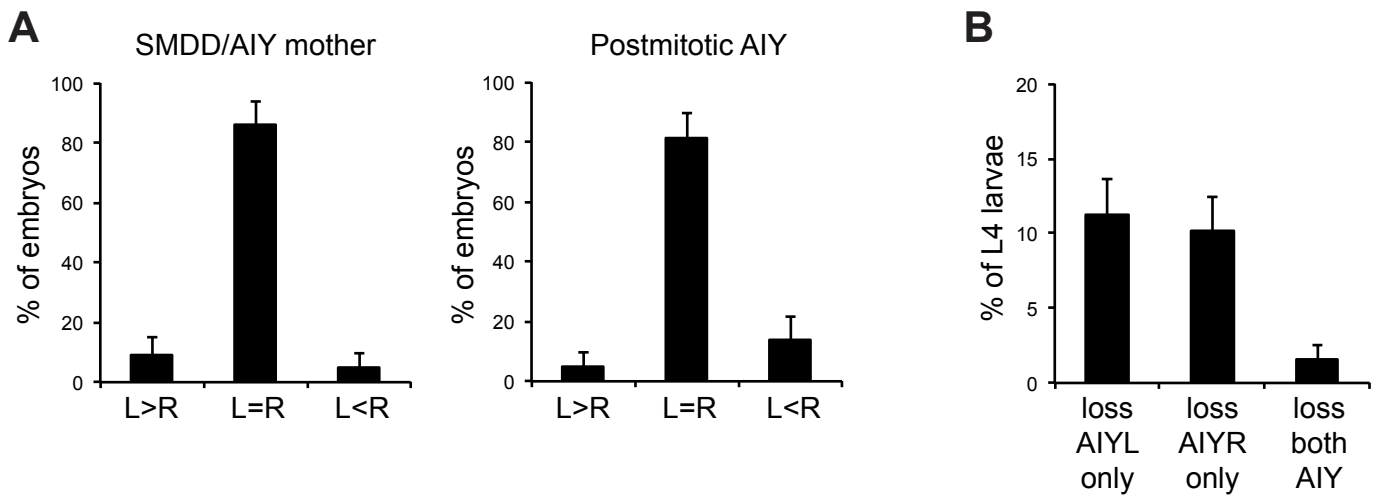

**Fig. S2. NGN-1 expression and loss of *ttx-3* expression in *ngn-1* mutants do not display left-right asymmetries.**

(A) Left-right asymmetry in the expression of the NGN-1 protein tagged with GFP (*nls394*) in embryos at epidermal enclosure stage before or after the terminal division of the SMDD/AIY mother cell. L>R: expression higher in the left lineage, L=R: expression identical between left and right lineages, L<R: expression lower in the left lineage. The AIY lineage is identified with *hlh-16p::mcherry* (*stls10546*). Error bars show standard error of proportion; n = 21 embryos analyzed for SMDD/AIY mother and 21 embryos analyzed for postmitotic AIY.

(B) Percentage of *ngn-1(ok2200)* larvae (L4 stage) with a loss of *ttx-3pB::gfp* (*otls173*) expression in the left AIY only, right AIY only, or both AIY. Error bars show standard error of proportion, n = 186 larvae analyzed.

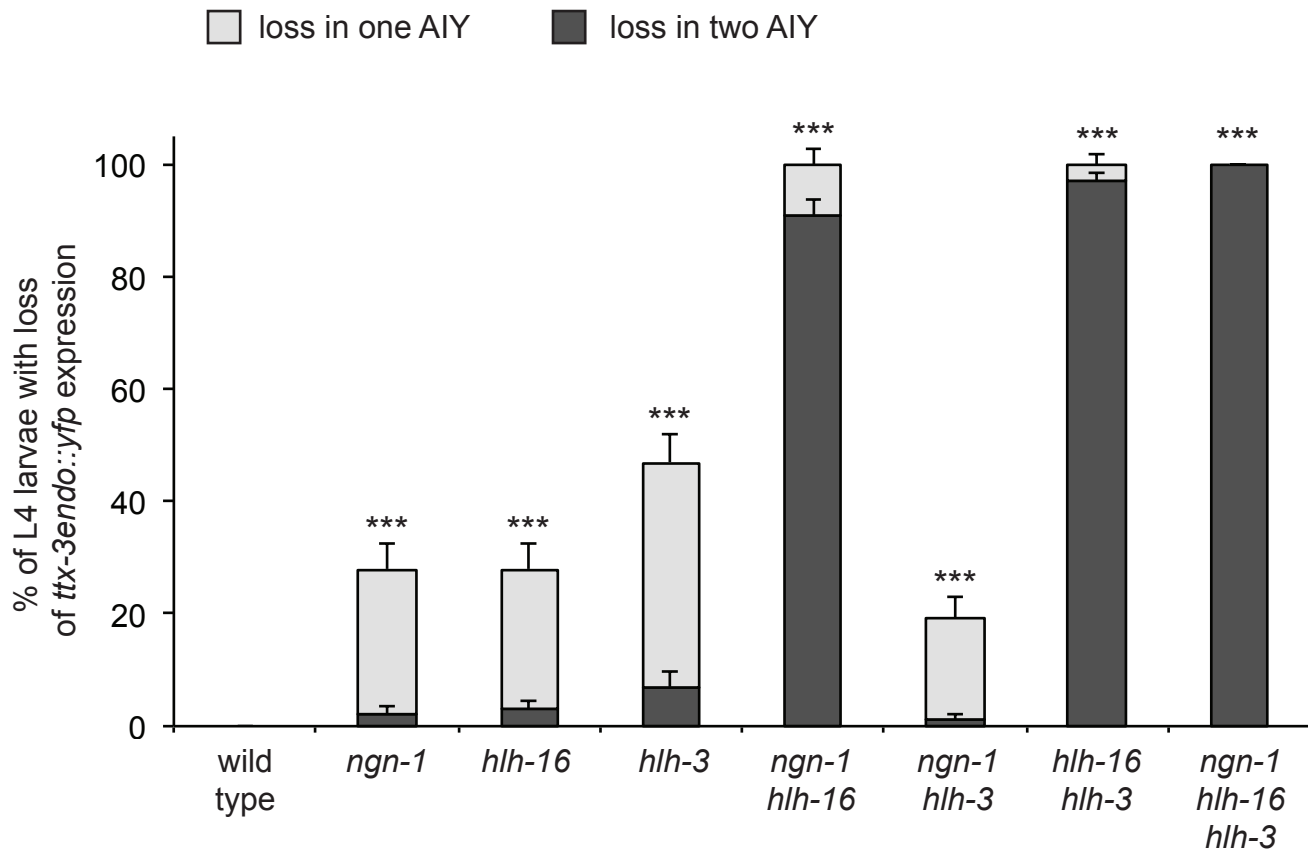

**Fig. S3. Effect of combinations of bHLH mutants on *ttx-3endo::yfp* expression at larval stage.** Percentage of animals with loss of *ttx-3endo::yfp* (*vba3*) expression in one or both AIY neurons at late larval stage (L4) in wild type or combinations of bHLH mutants. Error bars show standard error of proportion; n=100 neurons analyzed for each genotype; Fisher's exact test with Bonferroni correction for multiple comparisons (\*\*\*)  $p < 0.001$ .

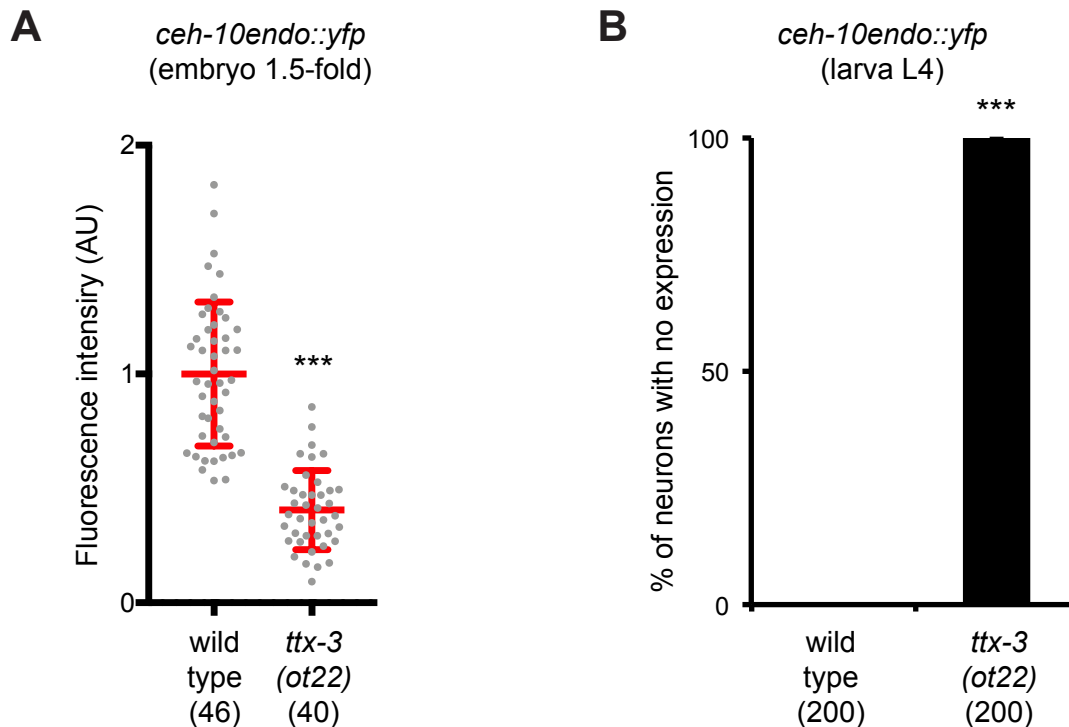

**Fig. S4. Effect of *ttx-3* mutants on *ceh-10endo::yfp* expression.**

(A) Quantification of the fluorescence levels of *ceh-10endo::yfp (vba1)* in AIY neurons at 1.5-fold embryonic stage in wild type or *ttx-3(ot22)* mutants. Each grey dot represents one neuron. The number of neurons analyzed is presented below the genotype. Red bars = mean and SD, Mann-Whitney test (\*\* $p < 0.001$ ).

(B) Percentage of AIY neurons with no expression of *ceh-10endo::yfp (vba1)* at L4 larval stage in wild type or *ttx-3(ot22)* mutants. The number of neurons analyzed is presented below the genotype; error bars show standard error of proportion; Fisher's exact test (\*\* $p < 0.001$ ).

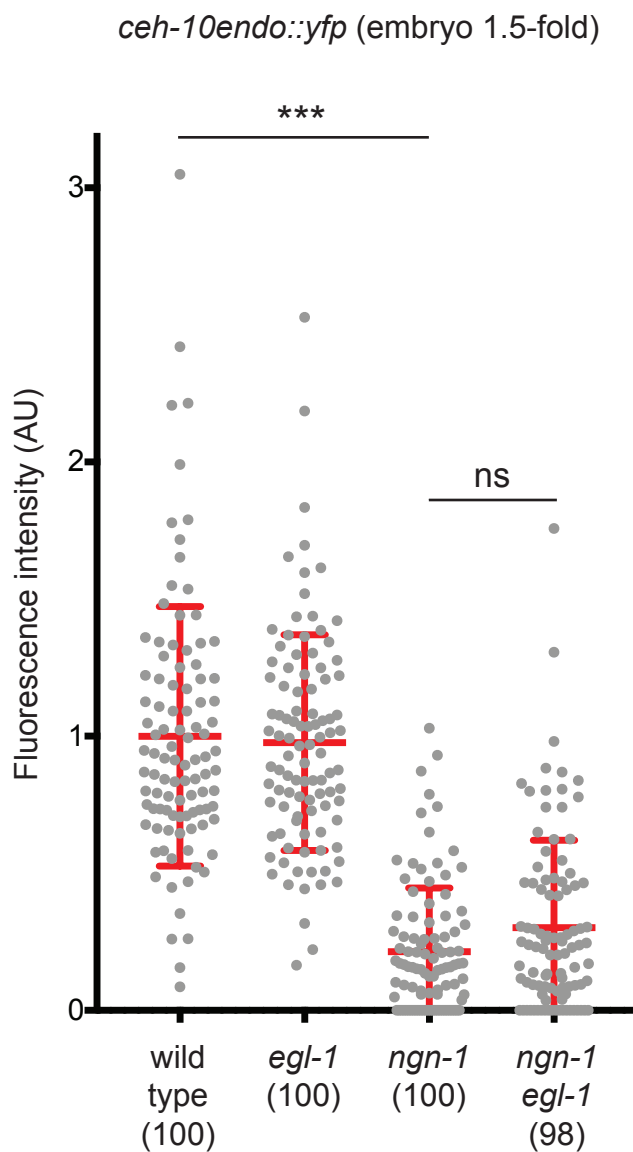

**Fig. S5. Effect of *ngn-1* and *egl-1* on *ceh-10* initiation level.**

Quantification of the fluorescence levels of *ceh-10endo::yfp* (*vba1*) in AIY neurons at 1.5-fold embryonic stage in wild type or combinations of *ngn-1(ok2200)* and *egl-1(n1084n3082)* mutants. Each grey dot represents one neuron. The number of neurons analyzed is presented below the genotype. Red bars = mean and SD, Mann-Whitney test with Bonferroni correction for multiple comparisons (ns: not significant, \*\*\*  $p < 0.001$ ).

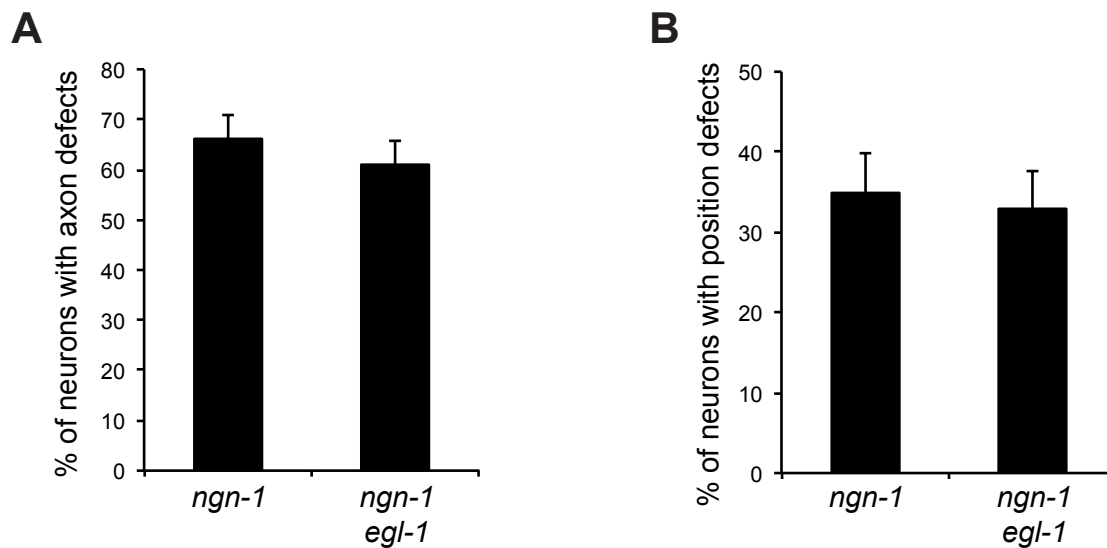

**Fig. S6. *egl-1* does not suppress axon and position defects of *ngn-1* mutants.**

(A) Percentage of AIY neurons expressing *ttx-3pB::gfp* (*otIs173*) with axonal projection defects in *ngn-1(ok2200)* single mutants or *ngn-1(ok2200); egl-1(n1084n3082)* double mutants at late larval stage (L4). Axonal projection is considered defective if the axon stops before reaching the middle of the nerve ring, n = 100 neurons analyzed for each genotype.

(B) Percentage of AIY neurons expressing *ttx-3pB::gfp* (*otIs173*) with cell body position defects in *ngn-1(ok2200)* single mutants or *ngn-1(ok2200); egl-1(n1084n3082)* double mutants at late larval stage (L4). Position is considered defective if the cell body is located anterior to the posterior bulb of the pharynx, n = 100 neurons analyzed for each genotype.

**Table S1. RNAi screen on bHLH factors.**

Presence (+) or absence (-) of defects of AIY labeled with *ttx-3pB::gfp (mgIs18)*. bHLH clones were tested in two different genetic backgrounds: *rrf-3(pk1426)* and *rrf-3(pk1426); hlh-2(bx115)*.

| ORF        | Gene name     | Clone source       | Clone name  | Defects in <i>rrf-3(pk1426)</i> | Defects in <i>rrf-3(pk1426); hlh-2(bx115)</i> |
|------------|---------------|--------------------|-------------|---------------------------------|-----------------------------------------------|
| C25A1.11   | <i>aha-1</i>  | Vidal Library      | mv_AAB99999 | -                               | -                                             |
| C41G7.5    | <i>ahr-1</i>  | Ahringer Library   | I-4P19      | -                               | -                                             |
| C15C8.2    | <i>cky-1</i>  | Vidal Library      | mv_C15C8.2  | -                               | -                                             |
| C34E10.7   | <i>cnd-1</i>  | Ahringer Library   | III-2B18    | -                               | -                                             |
| F38A6.3    | <i>hif-1</i>  | Ahringer Library   | V-13O05     | -                               | -                                             |
| B0304.1    | <i>hlh-1</i>  | Ahringer Library   | II-3J04     | -                               | -                                             |
| ZK682.4    | <i>hlh-10</i> | Ahringer Library   | V-6F01      | -                               | -                                             |
| F58A4.7    | <i>hlh-11</i> | Ahringer Library   | III-5K17    | -                               | -                                             |
| C28C12.8   | <i>hlh-12</i> | Ahringer Library   | IV-4G20     | -                               | -                                             |
| F48D6.3    | <i>hlh-13</i> | Ahringer Library   | X-2H09      | -                               | -                                             |
| C18A3.8    | <i>hlh-14</i> | Poole et al.       |             | -                               | -                                             |
| C43H6.8    | <i>hlh-15</i> | Ahringer Library   | X-1J06      | -                               | -                                             |
| DY3.3      | <i>hlh-16</i> | Ahringer Library   | I-4I02      | +                               | +                                             |
| F57C12.3   | <i>hlh-19</i> | Ahringer Library   | X-1E19      | -                               | -                                             |
| M05B5.5    | <i>hlh-2</i>  | Karp and Greenwald | pKM1196     | +                               | nd                                            |
| C17C3.8    | <i>hlh-26</i> | Vidal Library      | mv_C17C3.8  | -                               | -                                             |
| F31A3.2    | <i>hlh-28</i> | Ahringer Library   | X-7H22      | -                               | -                                             |
| F31A3.4    | <i>hlh-29</i> | Ahringer Library   | X-7J02      | -                               | -                                             |
| T24B8.6    | <i>hlh-3</i>  | Ahringer Library   | II-6F03     | -                               | +                                             |
| W02C12.3   | <i>hlh-30</i> | Ahringer Library   | IV-2C11     | -                               | -                                             |
| F38C2.8    | <i>hlh-31</i> | Ahringer Library   | IV-7J16     | -                               | -                                             |
| Y39A3CR.6  | <i>hlh-33</i> | Ahringer Library   | III-7I11    | -                               | -                                             |
| T01D3.2    | <i>hlh-34</i> | Ahringer Library   | V-9C07      | -                               | -                                             |
| T05G5.2    | <i>hlh-4</i>  | Vidal Library      | mv_T05G5.2  | -                               | -                                             |
| T15H9.3    | <i>hlh-6</i>  | Ahringer Library   | II-6J18     | -                               | -                                             |
| C02B8.4    | <i>hlh-8</i>  | Ahringer Library   | X-4M03      | -                               | -                                             |
| C44C10.8   | <i>hnd-1</i>  | Ahringer Library   | X-5J01      | -                               | -                                             |
| T14F9.5    | <i>lin-32</i> | Ahringer Library   | X-1D20      | -                               | -                                             |
| R03E9.1    | <i>mdl-1</i>  | Vidal Library      | mv_R03E9.1  | -                               | -                                             |
| T20B12.6   | <i>mml-1</i>  | Vidal Library      | mv_T20B12.6 | -                               | -                                             |
| T19B10.11  | <i>mxl-1</i>  | Ahringer Library   | V-7N05      | -                               | -                                             |
| F40G9.11   | <i>mxl-2</i>  | Ahringer Library   | III-1G23    | -                               | -                                             |
| F46G10.6   | <i>mxl-3</i>  | Ahringer Library   | X-6C16      | -                               | -                                             |
| Y69A2AR.29 | <i>ngn-1</i>  | Ahringer Library   | IV-8L18     | +                               | +                                             |
| T01E8.2    | <i>ref-1</i>  | Ahringer Library   | II-7O13     | -                               | -                                             |
| Y47D3B.7   | <i>sbp-1</i>  | Ahringer Library   | III-6C01    | -                               | -                                             |
| Y16B4A.1   | <i>unc-3</i>  | Ahringer Library   | X-6J06      | -                               | -                                             |

**Table S2. Genotyping primers.**

For large deletions, external (Ex) and internal (In) primers were used in forward (F) or reverse (R) orientation for PCR with the combinations: ExF/ExR, ExF/InR, InF/ExR. For point mutations or small deletions a pair of forward (F) and reverse (R) primers was used for PCR amplification before sequencing.

| Allele                   | Primers                                                                                                                         |
|--------------------------|---------------------------------------------------------------------------------------------------------------------------------|
| <i>ngn-1(tm2446)</i>     | ExF: GCCAAGTGAGAGCAAATTTGAC<br>ExR: CCAGCTCTTCCAGATGAGCC<br>InF: CGTCTCGCAGCACTGAGAGG<br>InR: CCTCTCAGTGCTGCGAGACG              |
| <i>ngn-1(ok2200)</i>     | ExF: ATTTCCGACGACGAACTGTC<br>ExR: ATCTCCAGACTGGTGTTCGG<br>InF: ACAGCTGTACAATACCATGAG<br>InR: GTTCGGATTTCTAAGCCACC               |
| <i>hlh-3(tm1688)</i>     | ExF: CACACAAAACAAGAACCGGCCAC<br>ExR: GACATTCCGAGTTGCTTCTGCAG<br>InF: ATTCAGAAGCTCCAGCGCAATGC<br>InR: ATGTGATTGCAATTCTGTCAACCATG |
| <i>rrf-3(pk1426)</i>     | ExF: TGCGATTGCGATTGGAAACTGCC<br>ExR: CTCTTGATACTTGCAGCATGTCC<br>InF: AAGAATGAGTCACGCTCATTGGC<br>InR: CGTTTCCATATTGAGAACCTTCGAC  |
| <i>hlh-2(bx115)</i>      | F: GGAATGCCACCAGGATCAAGTGC<br>R: GGTTTCCTTTTCATTCCAGCCATCAC                                                                     |
| <i>hlh-16(ot711)</i>     | F: GCCGACAGCTTCATCTCCG<br>R: TGAAGCCCTTCCACCGAAG                                                                                |
| <i>egl-1(n1084n3082)</i> | F: GATCTTCTACCAATGTCCAACG<br>R: ATGGAAGAGGCTTCTGTCCG                                                                            |
| <i>ttx-3(ot22)</i>       | F: CTTAACCCGCTTTGTACCGAGTAG<br>R: GACTGAACCAGTATTTTCATGCGTG                                                                     |
